# Supplementary material for: Ultraviolet Radiation-Induced Cytogenetic Damage in White, Hispanic and Black Skin Melanocytes: A Risk for Cutaneous Melanoma
Source: MDPI journal article supplement (doi:10.3390/cancers7030852), 2015-08-14
Supplement: s1 [file s1]

# Supplementary Material

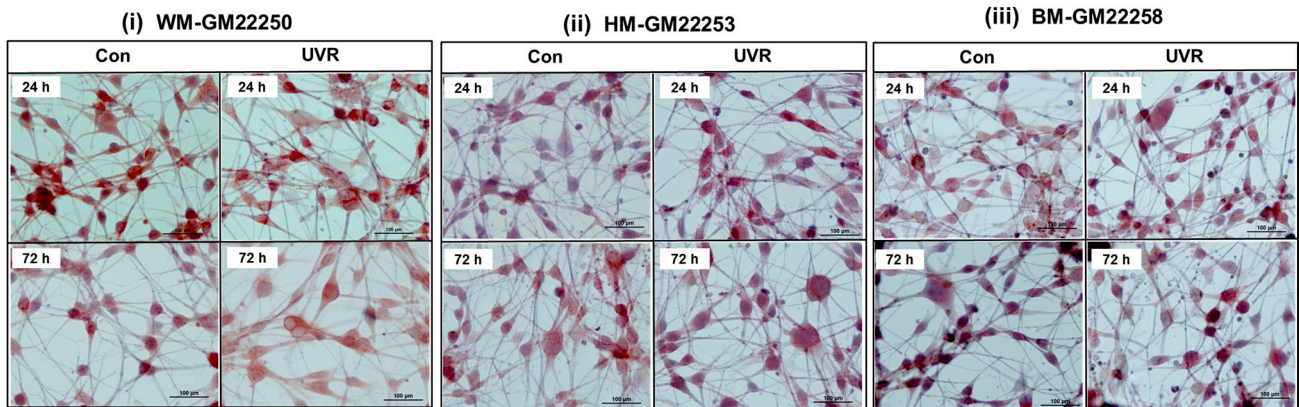

**Figure S1.** Effect of UVR on the expression of apoptosis marker, p53 on normal skin melanocytes; (i) White, (ii) Hispanic and (iii) Black at 24 h and 72 h post UV exposure. Images were obtained at 40 $\times$ .

© 2015 by the authors; licensee MDPI, Basel, Switzerland. This article is an open access article distributed under the terms and conditions of the Creative Commons Attribution license (<http://creativecommons.org/licenses/by/4.0/>).
